1 **Multi-site clinical validation of Isothermal Amplification based SARS-COV-2 detection assays**  
2 **using different sampling strategies**

3  
4 Kanan T. Desai<sup>1</sup>, Karla Alfaro<sup>2</sup>, Laura Mendoza<sup>3</sup>, Matthew Faron<sup>4</sup>, Brian Mesich<sup>4</sup>, Mauricio  
5 Maza<sup>2</sup>, Rhina Dominguez<sup>5</sup>, Adriana Valenzuela<sup>3</sup>, Chyntia Díaz Acosta<sup>3</sup>, Magaly Martínez<sup>3</sup>, Juan C.  
6 Felix<sup>4</sup>, Rachel Masch<sup>2,6</sup>, Sofia Gabrilovich<sup>7</sup>, Michael Plump<sup>7</sup>, Akiva P. Novetsky<sup>7,8</sup>, Mark H.  
7 Einstein<sup>7,8</sup>, Nataki C. Douglas<sup>7</sup>, Miriam Cremer<sup>2,9</sup>, Nicolas Wentzensen<sup>1</sup>

8  
9 **Affiliations**

10  
11 <sup>1</sup>Division of Cancer Epidemiology and Genetics, National Cancer Institute, NIH, Rockville, USA

12 <sup>2</sup>Basic Health International, Pittsburgh, USA

13 <sup>3</sup>Instituto de Investigaciones en Ciencias de la Salud, Universidad Nacional de Asunción, San  
14 Lorenzo, Paraguay

15 <sup>4</sup>Medical College of Wisconsin, Milwaukee, USA

16 <sup>5</sup>Research Unit, El Salvador National Institute of Health (INS), El Salvador

17 <sup>6</sup>The Mount Sinai Hospital, New York, USA

18 <sup>7</sup>Rutgers New Jersey Medical School, Newark, USA

19 <sup>8</sup>Rutgers Cancer Institute of New Jersey, New Brunswick, NJ, USA

20 <sup>9</sup>Cleveland Clinic Lerner College of Medicine, Cleveland, USA

21

22 **Corresponding author**

23

24 Kanan T. Desai

25 Clinical Genetics Branch

26 Division of Cancer Epidemiology and Genetics

27 National Cancer Institute, NIH, USA

28 Email: [kanan.desai@nih.gov](mailto:kanan.desai@nih.gov)

29

30

31 **Abstract (Limit: 250; Current:250)**

32

33 Background:

34 Isothermal amplification-based tests were developed as rapid, low-cost, and simple alternatives  
35 to real-time reverse transcriptase-polymerase chain reaction (RT-PCR) tests for SARS-COV-2  
36 detection.

37 Methods:

38 Clinical performance of two isothermal amplification-based tests (Atila Biosystems iAMP  
39 COVID-19 detection test and OptiGene COVID-19 Direct Plus RT-LAMP test) was compared to  
40 clinical RT-PCR assays using different sampling strategies. A total of 1378 participants were  
41 tested across four study sites.

42 Results:

43 Compared to standard of care RT-PCR testing, the overall sensitivity and specificity of the Atila  
44 iAMP test for detection of SARS-CoV-2 were 76.2% and 94.9%, respectively, and increased to  
45 88.8% and 89.5%, respectively, after exclusion of an outlier study site. Sensitivity varied based  
46 on the anatomic collected site. Sensitivity for nasopharyngeal was 65.4% (range across study  
47 sites:52.8%-79.8%), mid-turbinate 88.2%, saliva 55.1% (range across study sites:42.9%-77.8%)  
48 and anterior nares 66.7% (range across study sites:63.6%-76.5%). The specificity for these  
49 anatomic collection sites ranged from 96.7% to 100%. Sensitivity improved in symptomatic  
50 patients (overall 82.7%) and those with a higher viral load (overall 92.4% for  $ct \leq 25$ ). Sensitivity  
51 and specificity of the OptiGene Direct Plus RT-LAMP test, conducted at a single study-site, were  
52 25.5% and 100%, respectively.

53 **Conclusions**

54 The Atila iAMP COVID test with mid-turbinate sampling is a rapid, low-cost assay for detecting  
55 SARS-COV-2, especially in symptomatic patients and those with a high viral load, and could be  
56 used to reduce the risk of SARS-COV-2 transmission in clinical settings. Variation of  
57 performance between study sites highlights the need for site-specific clinical validation of these  
58 assays before clinical adoption.

59

60 **Keywords**

61

62 COVID-19, SARS-COV-2, Isothermal Amplification, clinical validation, cancer screening

63

64

65 **Main text (Limit:3000 excluding material-methods; Current: Total: 504+1988=2492 exclusive**  
66 **of material-methods)**

67

## 68 **Introduction**

69 The COVID-19 (Coronavirus Disease of 2019) pandemic has led to major disruptions in health  
70 services worldwide. In many developed nations, widespread SARS-CoV-2 (Severe acute  
71 respiratory syndrome coronavirus 2) testing and mass vaccination has allowed for a return to  
72 most elective health services. However, many low- and middle- income countries (LMICs) have  
73 limited access to testing and vaccination and continue to struggle to contain COVID-19 (1) (2).  
74 As the COVID-19 crisis continues , considerable reductions of cancer screening, cancer control,  
75 and elective clinical services remain (3). The safe return to cancer screening and elective  
76 testing and procedures during the pandemic, especially in low vaccination regions, requires  
77 reliable SARS-CoV-2 testing for both providers and patients.

78

79 Numerous SARS-CoV-2 detection assays have been developed and introduced into the market  
80 under emergency use authorizations (EUA) (4). EUAs are granted primarily based on analytic  
81 sensitivity (i.e., Limit of Detection (LOD)) and analytic specificity (i.e., cross-reactivity) with  
82 limited clinical validations. Yet, a thorough clinical performance evaluation of SARS-CoV-2  
83 assays is important to understand the strengths, limitations, and specific applications of these  
84 assays (5). Current Centers for Disease Control (CDC) guidelines recommend the use of  
85 laboratory-based nucleic acid amplification test (NAAT) (e.g., reverse transcriptase-  
86 polymerase chain reaction (RT-PCR)) for confirmatory testing. Specimens that are considered

87 optimal for detection include nasopharyngeal (NP), nasal mid-turbinate, and anterior nasal  
88 swabs. Currently, the CDC does not recommend NAAT that use oral specimens (e.g., saliva) for  
89 confirmatory testing (6–8).

90  
91 In addition to clinical performance, several other factors are important to consider when  
92 assessing feasibility of an assay for use in different environments and clinical settings. These  
93 factors include time to run the assay, hands-on time, throughput, ease of implementation, and  
94 cost. Furthermore, the possibility to use different sampling approaches, including self-  
95 collection, can be an important distinguishing feature since many LMICs have limited personal  
96 protective equipment (PPE). While RT-PCR assays fulfill the desired clinical performance criteria,  
97 they are not ideal for primary care clinics in resource-limited settings as point-of-care SARS-  
98 COV-2 screening tests due to high costs as well as longer turn around times and need for  
99 technical expertise (9). While rapid antigen-based tests address these limitations, they lack  
100 sensitivity to rule out an active infection (10). Isothermal amplification-based reverse  
101 transcription assays may fill this gap as they are more rapid (take ~ 1 hour), cheaper (~5-15  
102 USD per test) and simpler (not needing RNA extraction) than RT-PCR based tests (11), but  
103 require clinical validation.

104  
105 The primary objective of this study was to evaluate the clinical performance and operational  
106 characteristics of two isothermal amplification-based SARS-CoV-2 tests: 1) iAMP COVID-19  
107 detection test (Atila BioSystems, USA) targeting N and ORF1a-genes of SARS-COV-2 virus, and 2)  
108 COVID-19 Direct Plus RT-LAMP test (OptiGene Ltd., UK) targeting ORF1ab-gene of SARS-COV-2

109 virus, compared to clinical RT-PCR tests. The secondary objective was to evaluate the influence  
110 of different sampling strategies on the detection of SARS-COV-2. One specific use for such  
111 assays is rapid SARS-COV-2 testing to allow for a safer return to preventive clinical encounters  
112 such as cancer screening in low- and middle-income countries.

113

## 114 **Materials and Methods**

115

### 116 Study design and population

117

118 A cross-sectional study was conducted from December 2020 to April 2021 at four clinical sites:  
119 Hospital Nacional de Santa Ana, El Salvador; Hospital Materno Infantil de San Lorenzo,  
120 Ministerio de Salud Pública (MSP-BS), Paraguay; Medical College of Wisconsin (MCW), USA; and  
121 Rutgers New Jersey Medical School (NJMS), USA (Table 1). The study protocol and sampling  
122 strategies varied slightly across the study sites, based on local requirements.

123

124 At the El Salvador site, 900 asymptomatic and symptomatic subjects presenting for SARS-COV-2  
125 testing were enrolled. A standard NP swab for RT-PCR was collected from all the participants for  
126 clinical diagnosis. A second provider-collected dry NP swab and a self-collected direct saliva  
127 sample were obtained from study participants in parallel for the Atila iAMP test.

128

129 At the Paraguay site, 265 asymptomatic and symptomatic subjects presenting for SARS-COV-2  
130 testing were enrolled in the study. A standard NP swab for RT-PCR was collected from all the

131 participants for clinical diagnosis. In addition, for those consenting to participate in the study, a  
132 leftover of the clinical NP swab placed in viral transport medium (VTM) and a second parallel  
133 self-collected direct saliva sample were obtained for the Atila iAMP test.

134  
135 At the Wisconsin (MCW) site, 128 symptomatic and asymptomatic subjects presenting for  
136 SARS-COV-2 testing were enrolled in the study. A standard NP swab for RT-PCR was collected  
137 from all the participants for clinical diagnosis. In addition, for those consenting to participate, a  
138 second provider-collected dry NP swab, a self-collected dry mid-turbinate swab, a self-collected  
139 dry anterior nares swab, and a self-collected direct saliva sample were obtained in parallel for  
140 Atila iAMP test.

141  
142 At the New Jersey (NJMS) site, 55 symptomatic SARS-COV-2 positive patients, based on a prior  
143 RT-PCR assay, who were admitted for observation and management of COVID-19 were enrolled  
144 in the study. 28 of 55 (50.9%) of the patients were enrolled within 24 hours, 14 of 55 (25.5%)  
145 within 48 hours, and 6 of 55 (10.9%) within 72 hours of the sample collection for the RT-PCR  
146 test. In addition, 30 participants expected to be negative for the SARS-COV-2 infection (i.e., no  
147 SARS-COV-2 symptoms) were enrolled. A negative SARS-COV-2 RT-PCR test obtained within five  
148 days of test sample collection was performed on 28 (93.3%) of these 30 participants. Regardless  
149 of the RT-PCR status, for everyone enrolled in the study, a provider-collected dry NP swab and a  
150 provider-collected dry anterior nares swab was obtained at the time of enrollment for the Atila  
151 iAMP test. In addition, a provider-collected oropharyngeal (OP) swab placed in Sigma Virocult®



152 medium (MSW, UK) and a self-collected direct saliva sample was also obtained at the time of  
153 enrollment for the OptiGene Direct Plus RT-LAMP test.

154

155 The study protocol at all the sites was approved by the respective local institutional ethical  
156 review boards.

157

### 158 Test and RT-PCR assays

159

160 All the assays were performed as per the manufacturer's instruction for use (IFU).

161

162 The Atila iAMP test was performed on the same day of test sample collection for all samples in  
163 El Salvador, and 81 of 85 (95.3%) samples in New Jersey (NJMS). The samples not tested on the  
164 same day were frozen at -20°C in Paraguay and -80°C in Wisconsin (MCW) and tested in  
165 batches. A validated RT-PCR system (i.e., Biorad CFX96 RT system or Atila PowerGene 9600 Plus  
166 RT-PCR system) with FAM/HEX fluorescence detection was used for reaction run and detection.  
167 Positive and negative controls were run for each batch, and the batch was considered valid only  
168 if both controls were valid. The individual sample test result was determined to be positive if an  
169 exponential amplification curve with cycle threshold (ct)<50 was present in the FAM (ORF-1a/b  
170 or N-genes) channel. The test result was determined to be negative if the FAM channel did not  
171 have an amplification curve, and the HEX (internal control) channel had an exponential  
172 amplification curve with ct<50. The test was determined invalid if no amplification was  
173 detected in both FAM and HEX channels, in which case the test was repeated. If the repeat run

174 was also invalid, then the that sample was considered invalid. In total, 1.0% of NP, 1.4% of  
175 anterior nares, 3.9% of mid-turbinate, and 0% of saliva samples had invalid results. Less than  
176 1% (0.6%) of saliva samples could not be tested secondary to the samples being predominantly  
177 phlegm.

178  
179 With few exceptions [5 of 85 (6.0%)], the OptiGene Direct Plus RT-LAMP test was performed on  
180 the same day of the test sample collection. A Genie® III or II platform (OptiGene, UK) was used  
181 for the reaction run and detection. Positive and negative controls were run for each batch of  
182 samples, and the batch was considered valid only if both controls were valid. The Genie®  
183 software automatically analyzed the individual sample test results as positive or negative based  
184 on the amplification plot and annealing temperature. The test result is reported positive if the  
185 fluorescence level of the amplification curve rises above a defined threshold and the peak of  
186 the annealing curve is above a defined threshold and lies within a specified temperature range.  
187 All of the OP and anterior nares samples were tested. 19% of the saliva samples were not  
188 tested because those samples were predominantly phlegm without saliva.

189  
190 A single run was performed for each sample at all study sites except at NJMS which performed  
191 duplicate runs for each sample. To ensure comparability across the sites, for the pooled  
192 analysis, the first of the duplicate run at NJMS was used.

193

194 Statistical analysis

195

196 Pooled and study site-specific analyses were performed overall and stratified by different  
197 sampling strategies. For the overall analysis, if any sample anatomic collection site tested  
198 positive, that subject was identified as positive for that test assay. If all collection site samples  
199 were negative for the subject, the subject was considered negative for that test assay.

200

201 The NP sample for the RT-PCR test used for clinical diagnosis was considered the reference  
202 method. The sensitivity was defined as the proportion of RT-PCR positive samples which tested  
203 positive by the test assay, and specificity was defined as the proportion of the RT-PCR negative  
204 samples which tested negative by the test assay. Additional stratified analyses by the ct-value  
205 for the RT-PCR, as a surrogate marker for the viral load, and history of symptoms were also  
206 performed wherever the data was available. History of symptoms was collected from the  
207 subjects at the time of sample collection. 95% confidence intervals (CI) were calculated for the  
208 sensitivity and specificity measures. Imbalances in paired sample results were evaluated using  
209 Mc-Nemar's test, with a p-value <0.05 considered statistically significant. Data analysis was  
210 performed using IBM® SPSS software.

211

## 212 **Results**

213

### 214 Atila iAMP test

215

216 In the overall analysis (Figure 1), the sensitivity of the Atila iAMP test was 76.2% (95% CI: 71.1-  
217 80.7) and the specificity was 94.9% (95% CI: 93.3-96.1) for detection of SARS-CoV-2. Stratified

218 by study site, the sensitivity was 63.8% (95% CI: 55.9-71.2) in El Salvador, 88.5% (95% CI: 79.9-  
219 94.3) in Paraguay, 88.9% (95% CI: 65.3-98.6) in Wisconsin, and 89.1% (95% CI: 77.8-95.9) in New  
220 Jersey. The specificity was 97.2% (95% CI: 95.7-98.2), 81.3% (95% CI: 74.7-86.7), 100% (95% CI:  
221 96.6-100) and 100% (95% CI: 88.4-100), respectively. Since the El Salvador site's sensitivity was  
222 significantly lower than all the other sites, and considered an outlier, we conducted an overall  
223 pooled analysis excluding El Salvador, which demonstrated an overall sensitivity of 88.8% (95%  
224 CI: 82.8-93.2) and an overall specificity of 89.5% (95% CI: 85.6-92.7).

225  
226 We evaluated the clinical performance of individual sampling strategies (Figure 2). The  
227 sensitivity and specificity of the provider-collected NP sample was 65.4% (95% CI: 59.9-70.6)  
228 and 97.6% (95% CI: 96.5-98.4). Since sensitivity at the El Salvador site was significantly different  
229 than all the other sites, we recalculated the overall sensitivity excluding El Salvador, which led  
230 to the sensitivity of 78.9% (95% CI: 71.6-85.1) and specificity of 95.4% (95% CI: 92.4-97.5).

231  
232 Comparing the other sampling strategies to the reference standard NP sample, self-collected  
233 dry mid-turbinate sample (only collected at MCW) was found to be most sensitive [88.2% (95%  
234 CI: 63.6-98.5)] and specific [100% (95% CI: 96.5-100)]. Self-collected saliva samples, excluding El  
235 Salvador (due to significantly different estimate than other sites), had an overall sensitivity of  
236 74.5% (95% CI: 64.9-82.6) and overall specificity of 91.8% (95% CI: 87.9-94.7). The self-collected  
237 dry anterior nares sample was the least sensitive strategy with the overall sensitivity of 66.7%  
238 (95% CI: 54.6-77.3) and overall specificity of 100% (95% CI: 97.3-100). Since anterior nares  
239 sample was not collected at the El Salvador study site and none of the study sites had

240 significantly different estimate than other sites for anterior nares sample, no exclusion was  
241 made.

242  
243 Assuming that viral load would influence accuracy, we analyzed the sensitivity at different ct-  
244 values on RT-PCR among the positive subjects (Figure 3). Restricting the analysis to samples  
245 with  $ct \leq 35$ ,  $ct \leq 30$ ,  $ct \leq 25$ , and  $ct \leq 20$  increased the sensitivity to 82.6%, 97%, 100% and 100% for  
246 NP samples and 68%, 86.1%, 88.9%, and 100% for anterior nares samples in New Jersey (NJMS)  
247 and 79.8%, 81.3%, 88.4%, and 100% for NP samples and 73.8%, 73.8%, 79.7%, and 84.3% for  
248 saliva samples in Paraguay. The respective corresponding percentages for El Salvador were  
249 65.9%, 78.1%, 83.6%, and 89.1% for NP samples and 52.8%, 58.3%, 64.4% and 65.5% for saliva  
250 samples. Although the sensitivity increased in El Salvador with an increase in viral load (i.e. at  
251 lower ct-values), within each ct-value strata, the sensitivity in El Salvador was still lower than in  
252 Paraguay and New Jersey for each anatomic collection sites.

253  
254 The mean ct-value on RT-PCR in El Salvador among the RT-PCR positive asymptomatic subjects  
255 was 30.0 (95% CI: 25.6-30.4), and among symptomatic subjects was 22.5 (95% CI: 20.2-24.8).  
256 The respective corresponding values in Paraguay were 18 (95% CI: 13.7-22.4) and 17.5 (95% CI:  
257 15.8-19.2). The mean ct-value on RT-PCR in New Jersey among the RT-PCR positive subjects was  
258 25.7 (95% CI: 23.9-27.5); all RT-PCR positive subjects were hospitalized for observation and  
259 management of COVID-19 and so likely symptomatic. The sensitivity of the NP sample in El  
260 Salvador among symptomatic subjects was significantly higher [65.1% (95% CI: 54.1-75.1)] than  
261 among asymptomatic subjects [39.0% (95% CI: 28.0-50.8)] (Figure 4). The difference was not

262 significant between symptomatic and asymptomatic subjects for NP samples in Paraguay, saliva  
263 in El Salvador, and saliva in Paraguay. Among the symptomatics subjects, the sensitivity was  
264 significantly higher for saliva samples in Parguay [74.3% (95% CI: 62.4-84.0)] than in El Salvador  
265 [51.2% (95% CI: 40.1-62.1)]; the difference was not significant for the NP samples in Paraguay  
266 [81.7% (95% CI: 70.7-89.9)] and New Jersey [78% (95% CI: 64-88.5)] and in El Salvador [65.1%  
267 (95% CI: 54.1-75.1)]. Among the asymptomatic subjects, the difference for either NP [69.2%  
268 (95% CI: 38.6-90.9) in Paraguay and 39% (95% CI: 28.0-50.8) in El Salvador] or saliva samples  
269 [71.4% (95% CI: 41.9-91.6) in Paraguay and 33.8% (95% CI: 23.4-45.4) in El Salvador] was not  
270 significantly different between Parguay and El Salvador.

271

#### 272 OptiGene Direct Plus RT-LAMP test

273

274 The overall sensitivity and specificity of the OptiGene Direct Plus RT-LAMP test were 25.5%  
275 (95% CI: 14.7-39) and 100% (95% CI: 88.4-100), respectively (Figure 5). The estimates did not  
276 differ significantly by different sampling strategies or duplicate testing. Furthermore, when  
277 limiting the analysis to test samples collected within 24 hrs of RT-PCR sample collection, the  
278 overall sensitivity was still only 33.3%.

279

## 280 **Discussion**

281

282 The current study evaluated the clinical performance of two isothermal amplification tests for  
283 detection of SARS-CoV-2. The overall sensitivity and specificity of the Atila iAMP test for

284 detection of SARS-CoV-2, excluding the outlier study site, were 88.8% and 89.5%, respectively.  
285 The sensitivity, excluding the outlier study site, was 78.9% for nasopharyngeal, 88.2% for self-  
286 sampled mid-turbinate, 74.5% for direct saliva and 66.7% for anterior nares samples. The  
287 specificity for these sites ranged from 91.8% to 100%. The sensitivity increased with higher viral  
288 load (i.e., at lower ct-values) and among symptomatic as compared to asymptomatic  
289 participants. The sensitivity and specificity of the OptiGene Direct Plus RT-LAMP test, conducted  
290 at a single site, were 25.5% and 100%, respectively.

291  
292 There is scant literature on the performance of the Atila iAMP COVID test. We identified only  
293 one clinical performance evaluation of the Atila iAMP COVID test on the direct, non-extracted  
294 samples, which is the recommended application as per EUA by the manufacturer. This small-  
295 scale evaluation (n=197) showed a sensitivity of 44.1% and specificity of 96.6% for the Atila  
296 iAMP test on NP swabs with a large number (35.5% or 70/197) of invalid results (12). A small  
297 (n=50) analytic and clinical validation study on the Atila iAMP assay showed the analytic LOD  
298 for the assay to be 50-100 copies/reaction for ORF1-a/b gene and 1-10 for the N gene, which is  
299 higher than that of RT-PCR (average range of 1-10) (13). This may explain our finding of lower  
300 clinical sensitivity of the assay at higher ct-values, considering ct-values as a surrogate marker  
301 for the viral load, which may not always be precise (14). In the clinical validation by the same  
302 group, the assay was found to have 100% agreement with the RT-PCR. However, this validation  
303 was on extracted RNA and was based on 46/50 samples that have  $ct \leq 30$ . Another small (n=50)  
304 clinical validation (15), again on extracted RNA, showed the sensitivity and specificity of the  
305 assay to be 82.8% and 100%, respectively, with all five false-negative samples to have  $ct \geq 35$ .

306

307 The OptiGene Direct Plus RT-LAMP COVID assay has been previously clinically validated by the  
308 NHS trust to have a sensitivity of 70% for swabs and 79% for saliva, with an increase in  
309 sensitivity to 100% for swabs at  $ct \leq 25$  (16). However, similar to our validation, such high  
310 sensitivity was not confirmed by other groups, which showed the sensitivity in the range of  
311 46.7% (17) and 34%, including false-negative results on symptomatic high viral load subjects  
312 (18). Our validation study was based on kits purchased from the manufacturer, using fresh  
313 samples (not freeze-thawed samples) collected and placed in the VTM recommended by the  
314 manufacturer, and run as per the instructions provided by the manufacturer. Furthermore,  
315 even though the reference RT-PCR used in our assay targeted E or N2 and S gene in addition to  
316 the ORF1-a/b gene, given that a NP swab based RT-PCR is the accepted reference standard for  
317 the SARS-COV-2 diagnosis (7,8), we believe that clinical sensitivity of the assay should not be  
318 affected by the differences in gene targets between the assays. While it has been suggested  
319 that assays targeting the N gene are not a valid reference standard to evaluate the OptiGene  
320 Direct Plus RT-LAMP assay (19), this is not supported by clinical studies.

321

322 It is important to note that the IFU's for both assays state the need to confirm the negative test  
323 result with a more sensitive RT-PCR test, and do not claim to be the final screening answer (20).  
324 However, as compared to the RT-PCR assays, which may sometimes take >24 hr of turnaround  
325 time (TOT) with considerable cost, the isothermal amplification-based assay's advantage is its  
326 rapid TOT (~1 hour), lower cost, and ease of performance (no nucleic acid extraction needed).  
327 Thus, it can cheaply and rapidly identify high viral load subjects who are likely to be most



328 infectious (21)(22). Moreover, there is at least some evidence to suggest that RT-PCR positivity  
329 does not necessarily translate into infectivity because it can detect the shedding of post-  
330 infectious viral RNA particles shedding, particularly among post-symptomatic patients (23,24).  
331 The Atila iAMP has similar advantages as the rapid antigen tests with regard to ease of  
332 operability and quick TOT, but provides higher sensitivity (reported to be 67-73% for rapid  
333 antigen test (25,26)) resulting in more reassurance of a negative test result.

334

335 Variation in the performance of both the assays across various study sites in our evaluation and  
336 notable differences to other studies cannot be ignored. It demonstrates the limitations of EUAs  
337 which may not necessarily translate to acceptable clinical performance for all tests in all  
338 settings. A thorough clinical validation of diagnostic assays on a standardized panel of samples  
339 in clinical settings is advisable before its widespread adoption for clinical use.

340

341 We do not fully understand the reason for the variation in test performance across study-sites.  
342 Importantly, the populations at each site was different with respect to SARS-CoV-2 prevalence,  
343 clinical symptoms, and other factors, but stratified analyses showed similar performance at all  
344 sites except for El Salvador. Given that invalid results were rare and did not differ across the  
345 study sites and there was no consistent pattern observed in ct-values for the internal control  
346 [mean ct-values for the internal control for NP: 28.4 (95% CI: 28.1-28.7) (El Salvador), 34.1 (95%  
347 CI: 32.8-35.1) (MCW), 22.7 (21.9-23.4) (Paraguay), 25.4 (23.4-27.3) (NJMS); for saliva: 19.4 (95%  
348 CI: 19.1-19.7), 23.6 (95% CI: 23.1-24.2) (MCW), 22.1 (21.3-22.8) (Paraguay)], we do not attribute  
349 the lower sensitivity in our validation in El Salvador to sampling variation. Rather we

350 hypothesize the lower sensitivity of the Atila iAMP test in El Salvador to be related to multiple  
351 factors: relatively higher proportion of asymptomatic subjects as compared to Paraguay (69.8%  
352 versus 21.9%) and operator-dependent nature of the assay due to the hands-on nature of the  
353 test to set up the reaction (27). However, given that on stratified analysis by symptoms and ct-  
354 values, the sensitivity was still lower in El Salvador than other sites within the strata, makes the  
355 second explanation more likely. Variation in the reference standard RT-PCR method and RNA  
356 extraction kits used across the study sites as well as variation in duration of performing the test  
357 assay after collection is a limitation of our study and may also have influence on the study site-  
358 wide variations.

359

## 360 **Conclusions**

361

362 In this first large-scale multi-site clinical evaluation of the Atila BioSystems iAMP COVID-19  
363 detection test, the assay showed good sensitivity with high specificity for detection of SARS-  
364 CoV-2, particularly on high viral load (i.e.,  $ct \leq 25$ ) NP samples. In addition, it also showed  
365 moderate sensitivity for  $ct \leq 35$  NP samples and  $ct \leq 25$  saliva samples. Overall, the sensitivity was  
366 superior for NP and mid-turbinate samples compared to saliva and anterior nares samples. The  
367 rapid TOT, low cost, and lack of need for nucleic acid extraction make Atila iAMP test a  
368 reasonable alternative screening test for SARS-COV-2 for patients and providers in outpatient  
369 clinics to identify likely infectious subjects. When implemented with other COVID safety  
370 measures, such low cost testing can provide an approach for the safe reopening and daily  
371 clinical activities of essential medical services for the highest risk population in immediate need

372 of care. However, inconsistency observed in assay performance across the study sites highlights  
373 the need for a rigorous site-specific clinical performance evaluation of the isothermal-  
374 amplification-based assays before their clinical adoption.

375

## 376 **References**

- 377 1. WHO Coronavirus (COVID-19) Dashboard | WHO Coronavirus (COVID-19) Dashboard  
378 With Vaccination Data [Internet]. [cited 2021 May 11]. Available from:  
379 <https://covid19.who.int/>
- 380 2. COVID-19 Vaccine Market Dashboard | UNICEF Supply Division [Internet]. [cited 2021  
381 May 11]. Available from: [https://www.unicef.org/supply/covid-19-vaccine-market-](https://www.unicef.org/supply/covid-19-vaccine-market-dashboard)  
382 [dashboard](https://www.unicef.org/supply/covid-19-vaccine-market-dashboard)
- 383 3. Cancino RS, Su Z, Mesa R, Tomlinson GE, Wang J. The impact of COVID-19 on cancer  
384 screening: challenges and opportunities [Internet]. Vol. 6, JMIR Cancer. JMIR Publications  
385 Inc.; 2020 [cited 2021 May 11]. Available from:  
386 <https://pubmed.ncbi.nlm.nih.gov/33027039/>
- 387 4. In Vitro Diagnostics EUAs - Molecular Diagnostic Tests for SARS-CoV-2 | FDA [Internet].  
388 [cited 2021 May 11]. Available from: [https://www.fda.gov/medical-devices/coronavirus-](https://www.fda.gov/medical-devices/coronavirus-disease-2019-covid-19-emergency-use-authorizations-medical-devices/in-vitro-diagnostics-euas-molecular-diagnostic-tests-sars-cov-2#individual-molecular)  
389 [disease-2019-covid-19-emergency-use-authorizations-medical-devices/in-vitro-](https://www.fda.gov/medical-devices/coronavirus-disease-2019-covid-19-emergency-use-authorizations-medical-devices/in-vitro-diagnostics-euas-molecular-diagnostic-tests-sars-cov-2#individual-molecular)  
390 [diagnostics-euas-molecular-diagnostic-tests-sars-cov-2#individual-molecular](https://www.fda.gov/medical-devices/coronavirus-disease-2019-covid-19-emergency-use-authorizations-medical-devices/in-vitro-diagnostics-euas-molecular-diagnostic-tests-sars-cov-2#individual-molecular)
- 391 5. Mitchell SL, St George K, Rhoads DD, Butler-Wu SM, Dharmarha V, McNult P, et al.  
392 Understanding, verifying, and implementing emergency use authorization molecular  
393 diagnostics for the detection of sars-cov-2 RNA [Internet]. Vol. 58, Journal of Clinical

- 394 Microbiology. American Society for Microbiology; 2020 [cited 2021 May 11]. Available  
395 from: <http://jcm.asm.org/>
- 396 6. Nucleic Acid Amplification Tests (NAATs) | CDC [Internet]. [cited 2021 May 28]. Available  
397 from: <https://www.cdc.gov/coronavirus/2019-ncov/lab/naats.html>
- 398 7. A Composite Reference Standard for COVID-19 Diagnostic Accuracy Studies: a roadmap -  
399 The Centre for Evidence-Based Medicine [Internet]. [cited 2021 May 14]. Available from:  
400 [https://www.cebm.net/covid-19/a-composite-reference-standard-for-covid-19-  
401 diagnostic-accuracy-studies-a-roadmap/](https://www.cebm.net/covid-19/a-composite-reference-standard-for-covid-19-<br/>401 diagnostic-accuracy-studies-a-roadmap/)
- 402 8. Laboratory testing of 2019 novel coronavirus (2019-nCoV) in suspected human cases:  
403 interim guidance, 17 January 2020 [Internet]. [cited 2021 May 14]. Available from:  
404 [https://www.who.int/publications/i/item/laboratory-testing-of-2019-novel-coronavirus-  
405 \(-2019-ncov\)-in-suspected-human-cases-interim-guidance-17-january-2020](https://www.who.int/publications/i/item/laboratory-testing-of-2019-novel-coronavirus-<br/>405 (-2019-ncov)-in-suspected-human-cases-interim-guidance-17-january-2020)
- 406 9. Favresse J, Gillot C, Oliveira M, Cadrobbi J, Elsen M, Eucher C, et al. Head-to-Head  
407 Comparison of Rapid and Automated Antigen Detection Tests for the Diagnosis of SARS-  
408 CoV-2 Infection. *J Clin Med* [Internet]. 2021 Jan 13 [cited 2021 May 11];10(2):265.  
409 Available from: </pmc/articles/PMC7828347/>
- 410 10. Interim Guidance for Antigen Testing for SARS-CoV-2 | CDC [Internet]. [cited 2021 May  
411 28]. Available from: [https://www.cdc.gov/coronavirus/2019-  
412 ncov/lab/resources/antigen-tests-guidelines.html#table1](https://www.cdc.gov/coronavirus/2019-<br/>412 ncov/lab/resources/antigen-tests-guidelines.html#table1)
- 413 11. COVID-19 – AtilaBiosystems [Internet]. [cited 2021 May 11]. Available from:  
414 <https://atilabiosystems.com/our-products/covid-19/>
- 415 12. Ganesan S. Evaluation of seven different rapid methods for nucleic acid detection of

- 416 SARS-COV-2 virus 2 Running title: Rapid methods for nucleic acid detection of SARS-COV-  
417 2 virus [Internet]. Preprint on medRxiv. [cited 2021 May 14]. Available from:  
418 <https://doi.org/10.1101/2021.04.15.21255533>
- 419 13. SARS-CoV-2 molecular assay evaluation: results - FIND [Internet]. [cited 2021 May 14].  
420 Available from: [https://www.finndx.org/covid-19/sarscov2-eval-molecular/molecular-](https://www.finndx.org/covid-19/sarscov2-eval-molecular/molecular-eval-results/)  
421 [eval-results/](https://www.finndx.org/covid-19/sarscov2-eval-molecular/molecular-eval-results/)
- 422 14. Ct Values: What They Are and How They Can be Used • Version 2 • Is there variability in  
423 Ct values? 2021;
- 424 15. Bulterys PL, Garamani N, Stevens B, Sahoo MK, Huang CH, Hogan CA, et al. Comparison  
425 of a laboratory-developed test targeting the envelope gene with three nucleic acid  
426 amplification tests for detection of SARS-CoV-2. J Clin Virol [Internet]. 2020 Aug 1 [cited  
427 2021 May 14];129. Available from: <https://pubmed.ncbi.nlm.nih.gov/32535398/>
- 428 16. Rapid evaluation of OptiGene RT-LAMP assay (direct and RNA formats) - GOV.UK  
429 [Internet]. [cited 2021 May 14]. Available from:  
430 [https://www.gov.uk/government/publications/rapid-evaluation-of-optigene-rt-lamp-](https://www.gov.uk/government/publications/rapid-evaluation-of-optigene-rt-lamp-assay-direct-and-rna-formats/rapid-evaluation-of-optigene-rt-lamp-assay-direct-and-rna-formats)  
431 [assay-direct-and-rna-formats/rapid-evaluation-of-optigene-rt-lamp-assay-direct-and-rna-](https://www.gov.uk/government/publications/rapid-evaluation-of-optigene-rt-lamp-assay-direct-and-rna-formats/rapid-evaluation-of-optigene-rt-lamp-assay-direct-and-rna-formats)  
432 [formats](https://www.gov.uk/government/publications/rapid-evaluation-of-optigene-rt-lamp-assay-direct-and-rna-formats/rapid-evaluation-of-optigene-rt-lamp-assay-direct-and-rna-formats)
- 433 17. Iacobucci G. Covid-19: Rapid test missed over 50% of positive cases in Manchester pilot.  
434 BMJ. 2020 Nov 6;371:m4323.
- 435 18. Wilson-Davies ESW, Mahanama AIK, Samaraweera B, Ahmed N, Friar S, Pelosi E.  
436 Concerns regarding the sensitivity of the OptiGene direct SARS-CoV-2 LAMP assay and its  
437 suitability for use in at-risk groups and hospital staff [Internet]. Vol. 82, Journal of

- 438 Infection. W.B. Saunders Ltd; 2021 [cited 2021 May 14]. p. 282–327. Available from:  
439 [/pmc/articles/PMC7870105/](#)
- 440 19. Fowler DV, Douglas DA, Godfrey PK, Williams PA, Beggs PA, Kidd S, et al. Critical  
441 evaluation of the methodology used by Wilson-Davies et al., (2020) entitled “Concerning  
442 the Optigene Direct LAMP assay, and it’s use in at-risk groups and hospital staff.” Vol. 82,  
443 Journal of Infection. W.B. Saunders Ltd; 2021. p. 282–327.
- 444 20. Direct RT-LAMP for Hospital Screening | The BMJ [Internet]. [cited 2021 May 14].  
445 Available from: <https://www.bmj.com/content/371/bmj.m4323/rr-1>
- 446 21. Sohni Y. Variation in LOD Across SARS-CoV-2 Assay Systems: Need for Standardization.  
447 Lab Med. 2021 Mar 15;52(2):107–15.
- 448 22. Jefferson T, Spencer EA, Brassey J, Heneghan C. Viral cultures for COVID-19 infectious  
449 potential assessment – a systematic review. Clin Infect Dis [Internet]. 2020 Dec 3 [cited  
450 2021 May 14]; Available from: <https://pubmed.ncbi.nlm.nih.gov/33270107/>
- 451 23. Wölfel R, Corman VM, Guggemos W, Seilmaier M, Zange S, Müller MA, et al. Virological  
452 assessment of hospitalized patients with COVID-2019. Nature [Internet]. 2020 May 28  
453 [cited 2021 May 14];581(7809):465–9. Available from:  
454 <https://pubmed.ncbi.nlm.nih.gov/32235945/>
- 455 24. Cevik M, Kuppalli K, Kindrachuk J, Peiris M. Virology, transmission, and pathogenesis of  
456 SARS-CoV-2. BMJ [Internet]. 2020 Oct 23 [cited 2021 May 14];371. Available from:  
457 <http://dx.doi.org/10.1136/bmj.m3862>
- 458 25. Favresse J, Gillot C, Oliveira M, Cadrobbi J, Elsen M, Eucher C, et al. Head-to-Head  
459 Comparison of Rapid and Automated Antigen Detection Tests for the Diagnosis of SARS-

- 460 CoV-2 Infection. J Clin Med [Internet]. 2021 Jan 13 [cited 2021 May 14];10(2):265.  
461 Available from: [/pmc/articles/PMC7828347/](https://pubmed.ncbi.nlm.nih.gov/33939481/)
- 462 26. Stovitz SD. In suspected SARS-CoV-2, rapid antigen detection tests had 67% to 73%  
463 sensitivity and 98% to 100% specificity. Ann Intern Med [Internet]. 2021 May 4 [cited  
464 2021 May 14]; Available from: <http://www.ncbi.nlm.nih.gov/pubmed/33939481>
- 465 27. Crozier A, Rajan S, Buchan I, McKee M. Put to the test: Use of rapid testing technologies  
466 for Covid-19. BMJ [Internet]. 2021 Feb 3 [cited 2021 May 14];372. Available from:  
467 <http://dx.doi.org/10.1136/bmj.n208>  
468

469 **Table 1: Description of the study population**

| Descriptors                             |                                                                                             | El Salvador         | Paraguay            | Wisconsin           | New Jersey N/Total (%) |          |
|-----------------------------------------|---------------------------------------------------------------------------------------------|---------------------|---------------------|---------------------|------------------------|----------|
|                                         |                                                                                             | N/Total (%)         | N/Total (%)         | N/Total (%)         | Atila                  | Optigene |
| <b>Type of PCR<br/>(reference) test</b> | Abbott® RealTime<br>SARS-COV-2 assay<br>(Abbott, USA)<br>targeting RdRp and<br>N-genes      | 900/900<br>(100.0%) | 0                   | 0                   | 0                      |          |
|                                         | Cobas® SARS-COV-2<br>assay (Roche<br>Diagnostics, USA)<br>targeting ORF-1a/b<br>and E-genes | 0                   | 0                   | 128/128<br>(100.0%) | 0                      |          |
|                                         | STAT-NAT® COVID-19<br>MULTI assay (Sentinel                                                 | 0                   | 265/265<br>(100.0%) | 0                   | 0                      |          |



|  |                                                                                                     |   |   |   |                |
|--|-----------------------------------------------------------------------------------------------------|---|---|---|----------------|
|  | Diagnostics, Italy)<br>targeting RdRP and<br>ORF1b-genes                                            |   |   |   |                |
|  | Xpert Xpress SARS-<br>COV-2 assay<br>(Cepheid®, USA)<br>targeting N2 and E-<br>genes                | 0 | 0 | 0 | 14/85# (16.5%) |
|  | Simplexa™ COVID-19<br>Direct assay (DiaSorin<br>Molecular, USA)<br>targeting ORF-1ab<br>and S-genes | 0 | 0 | 0 | 50/85# (58.8%) |

|                                                                                          |                                                  |                     |                     |                                |                            |
|------------------------------------------------------------------------------------------|--------------------------------------------------|---------------------|---------------------|--------------------------------|----------------------------|
|                                                                                          | Quest Diagnostics<br>lab-developed test<br>(LDT) | 0                   | 0                   | 0                              | 1/85 <sup>#</sup> (1.2%)   |
| <b>PCR (reference)<br/>result</b>                                                        | Positive                                         | 163/900 (18.1%)     | 87/264 (33.0%)      | 18/126 <sup>^</sup><br>(14.1%) | 55/85 (64.7%)              |
| <b>PCR (reference)<br/>result by ct-values</b>                                           | <=20                                             | 57/163 (35.0%)      | 54/87 (62.1%)       | N/A                            | 10/55 <sup>#</sup> (18.2%) |
|                                                                                          | 21-25                                            | 17/163 (10.4%)      | 20/87 (23.0%)       |                                | 20/55 <sup>#</sup> (36.4%) |
|                                                                                          | 26-30                                            | 24/163 (14.7%)      | 9/87 (10.3%)        |                                | 7/55 <sup>#</sup> (12.7%)  |
|                                                                                          | 31-35                                            | 26/163 (16.0%)      | 4/87 (4.6%)         |                                | 14/55 <sup>#</sup> (25.5%) |
|                                                                                          | >=36                                             | 39/163 (23.9%)      | 0                   |                                | 2/55 <sup>#</sup> (3.6%)   |
| <b>Duration between<br/>sample collection<br/>for PCR (reference)<br/>and test assay</b> | Parallal (Same day)                              | 900/900<br>(100.0%) | 265/265<br>(100.0%) | 128/128<br>(100.0%)            | 8/85 (9.4%)                |

|                                                                                |                                |                   |                     |     |                    |       |                  |                  |     |    |    |     |
|--------------------------------------------------------------------------------|--------------------------------|-------------------|---------------------|-----|--------------------|-------|------------------|------------------|-----|----|----|-----|
| <b>Duration between sample collection for test assay and running the assay</b> |                                | Same day          | 900/900<br>(100.0%) | 0   | N/A                |       | 81/85<br>(95.3%) | 80/85<br>(94.1%) |     |    |    |     |
| <b>Sample collection sites</b>                                                 |                                | Nasopharyngeal    | 900                 | 900 | 265                | 258   | 128              | 123              | 79  | 78 | 0  | 0   |
| Total sample collected                                                         | Total sample with valid result | Saliva***         | 900                 | 900 | 265                | 259** | 128              | 126*             | 0   | 0  | 84 | 68* |
|                                                                                |                                | Anterior Nares*** | 0                   | 0   | 0                  | 0     | 128              | 126              | 85  | 84 | 85 | 85  |
|                                                                                |                                | Mid-turbinate***  | 0                   | 0   | 0                  | 0     | 127              | 122              | 0   | 0  | 0  | 0   |
|                                                                                |                                | Oropharyngeal     | 0                   | 0   | 0                  | 0     | 0                | 0                | 13  | 11 | 71 | 71  |
| <b>Age (years)</b>                                                             |                                | 18-28             | 204/900 (22.7%)     |     | 118/265<br>(44.5%) |       | N/A              |                  | N/A |    |    |     |
|                                                                                |                                | 29-39             | 242/900 (26.9%)     |     | 74/265 (27.9%)     |       |                  |                  |     |    |    |     |
|                                                                                |                                | 40-50             | 222/900 (24.7%)     |     | 41/265 (15.5%)     |       |                  |                  |     |    |    |     |

|                    |        |                                   |                                   |                                  |                       |
|--------------------|--------|-----------------------------------|-----------------------------------|----------------------------------|-----------------------|
|                    | >=51   | 232/900 (25.8%)                   | 32/265 (12.1%)                    |                                  |                       |
| <b>Gender</b>      | Male   | 425/900 (47.2%)                   | 106/265<br>(40.0%)                | N/A                              | N/A                   |
|                    | Female | 475/900 (52.8%)                   | 159/265<br>(60.0%)                |                                  |                       |
| <b>Symptomatic</b> | Yes    | 272/900 (30.2%)                   | 207/265<br>(78.1%)                | N/A                              | 31/61 (50.8%)         |
| <b>Total</b>       |        | <b>900/1378</b><br><b>(65.3%)</b> | <b>265/1378</b><br><b>(19.2%)</b> | <b>128/1378</b><br><b>(9.3%)</b> | <b>85/1378 (6.2%)</b> |

470 N/A-Data not available; \*All invalid runs were due to insufficient sample/mainly phlegm to process; \*\*Three samples out of six total invalid runs were due to  
471 insufficient sample/mainly phlegm to process; \*\*\* saliva, mid-turbinate, and anterior nares (at Wiconsin) were self-collected, # Type of RT-PCR data not  
472 available for 20 of 85 samples, Ct-values not available for 2 of 55 samples; ^RT-PCR results missing for 2 of 128 subjects.

473

474 **Figure 1: Study site specific analysis of validity of Atila iAMP assay against PCR (Reference) test (not stratified by sample collection**  
475 **site)**

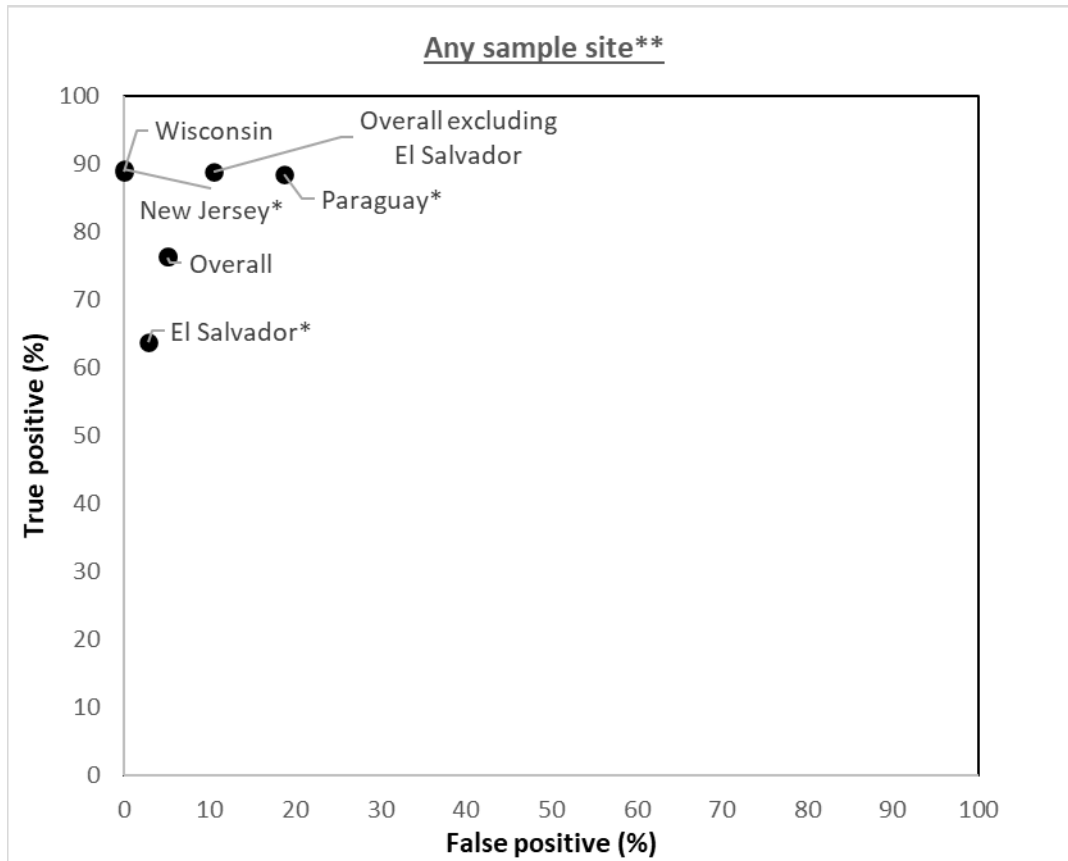

476

477 \*P-value < 0.05 for McNemar's test (continuity corrected); \*\*Any sample collection site positive out of the total samples collected is considered positive

478

479 **Figure 2: Study site specific analysis of validity of Atila iAMP assay against PCR (Reference) test (stratified by sample collection**  
 480 **site)**

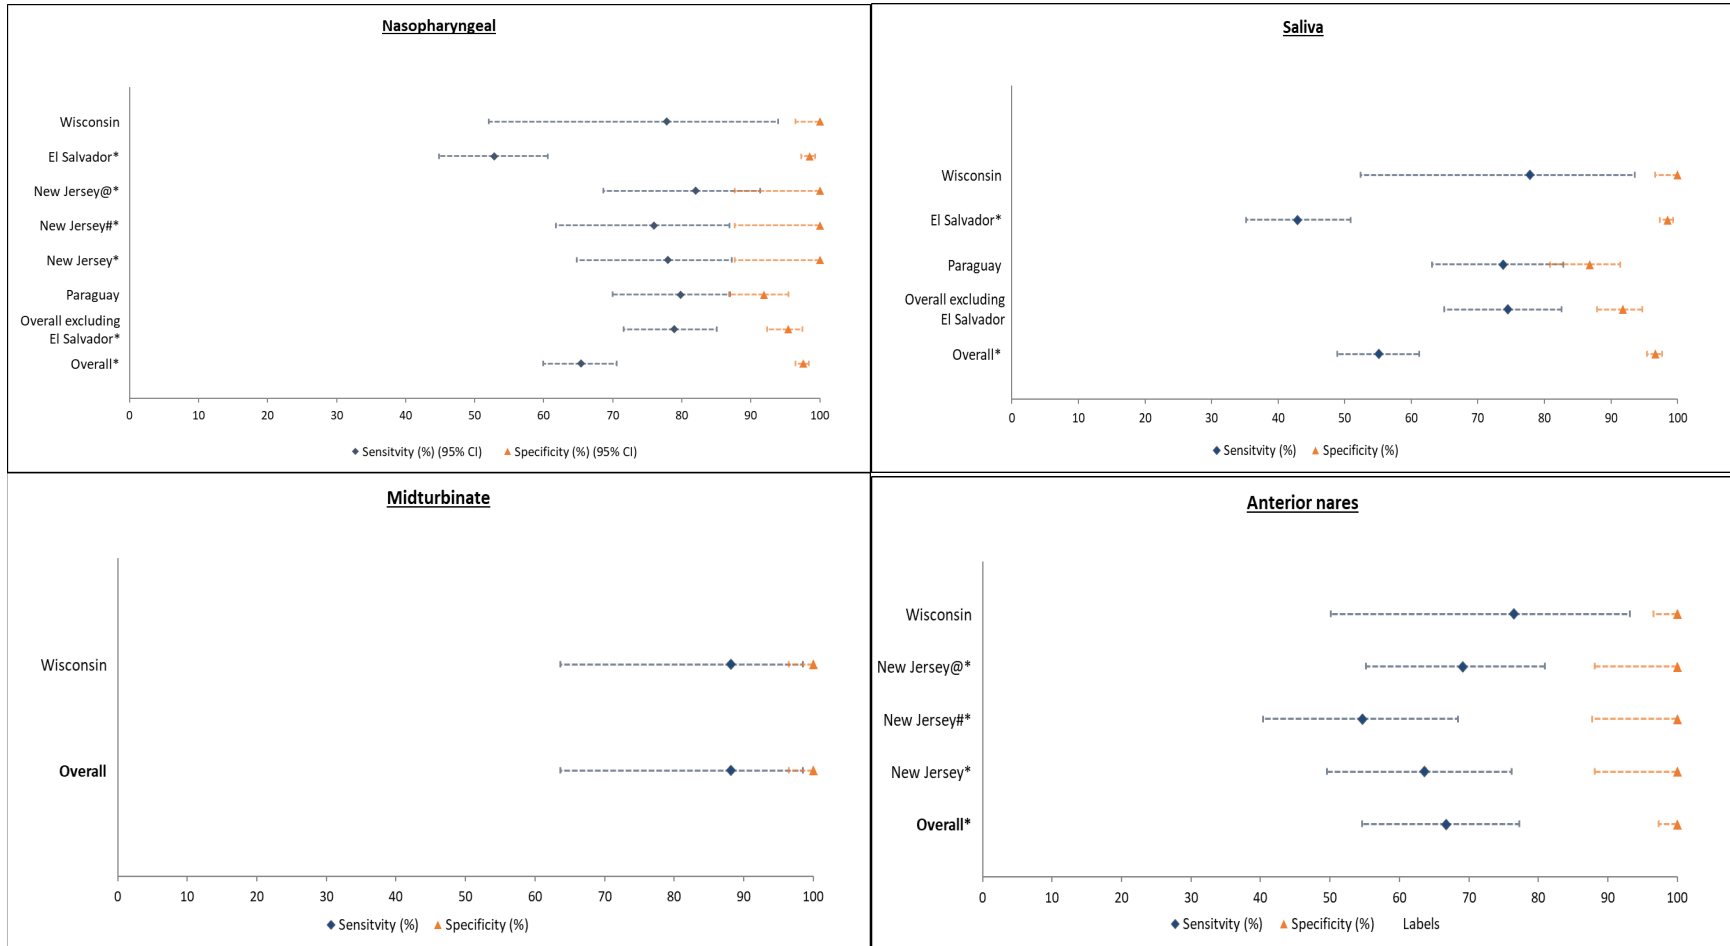

481

482

483 \*P-value < 0.05 for McNemar's test (continuity corrected); #Samples were tested in duplicates and the test was considered positive only if both were positive;

484 @Samples were tested in duplicates and the test was considered positive if either was positive

485 **Figure 3: Study site and sample site specific analysis of the sensitivity of Atila iAMP assay against PCR (Reference) test stratified by**  
 486 **the ct-values**

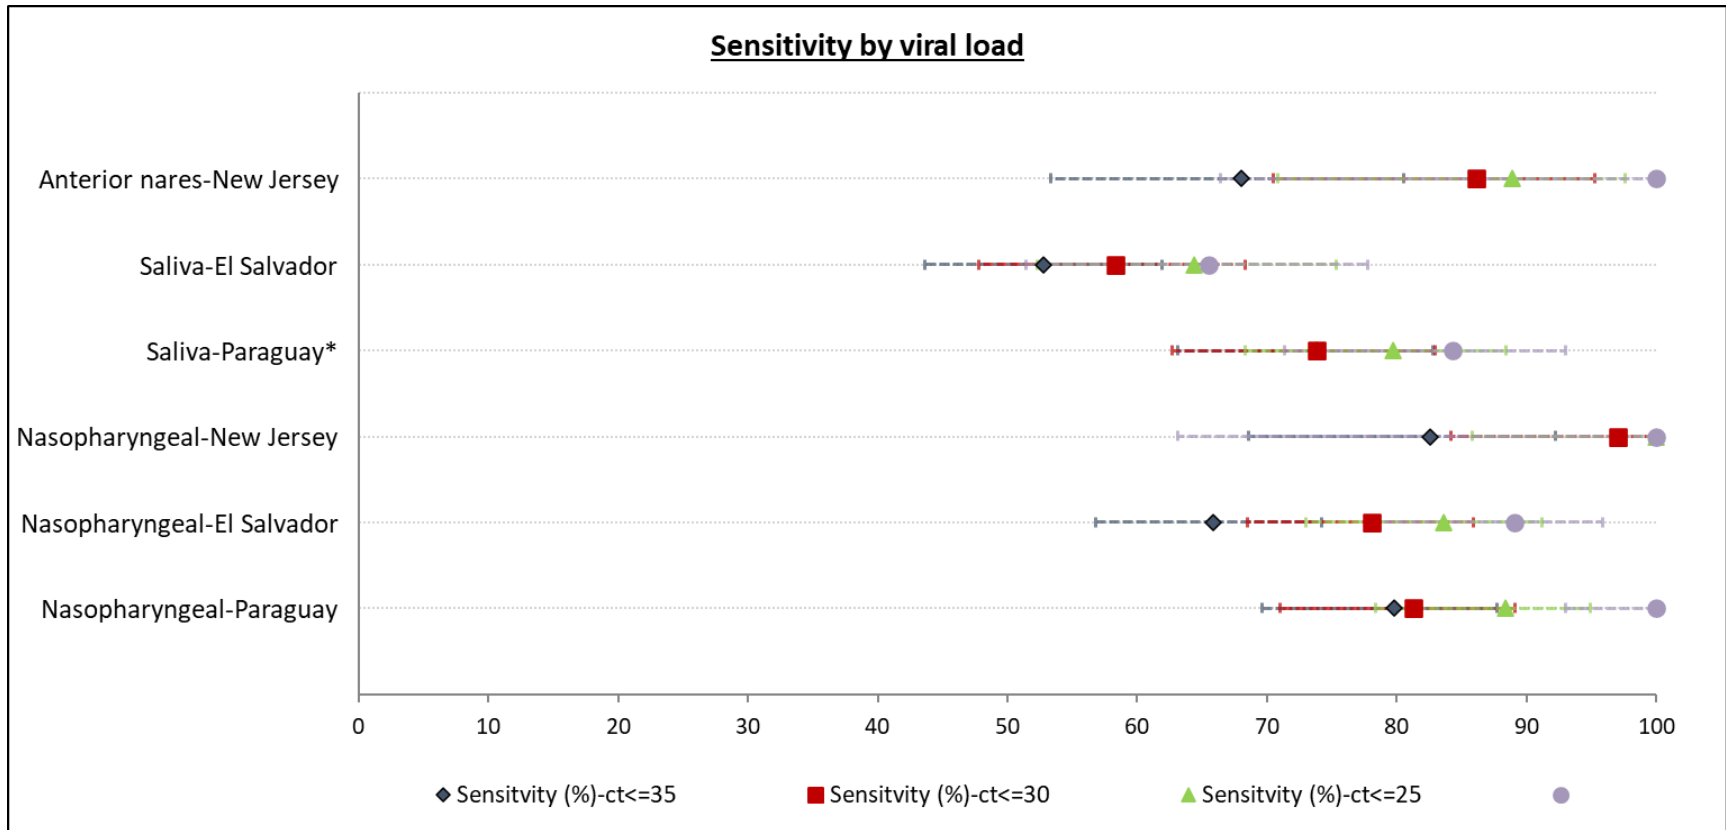

487  
 488 \*Sensitivity for ct < 35 and ct < 30 was equal

489

490 **Figure 4: Study site and sample site specific analysis of validity of Atila iAMP assay against PCR (Reference) test stratified by the**  
491 **Symptoms**

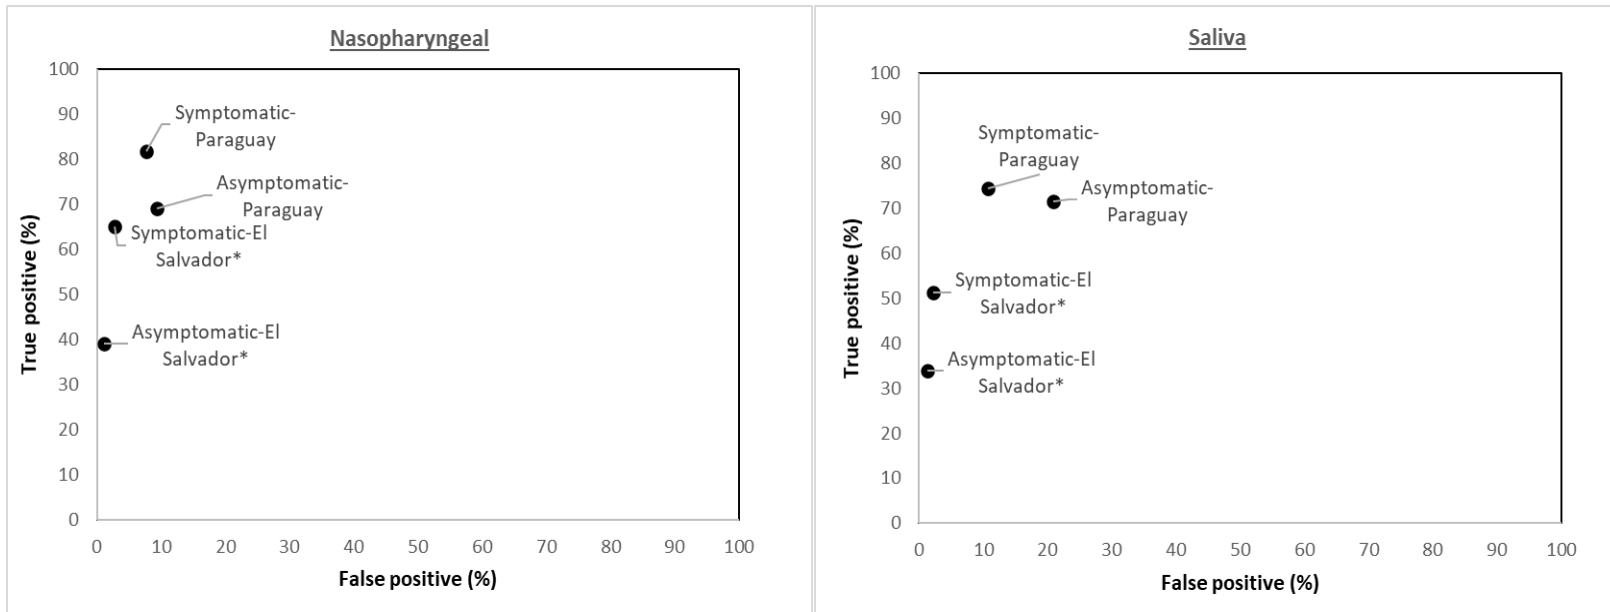

492

493 \*P-value < 0.05 for McNemar's test (continuity corrected)

494



495 **Figure 5: Study site specific analysis of validity of OptiGene Direct Plus RT-LAMP assay against PCR (Reference) test (overall and**  
 496 **stratified by sample collection site)**

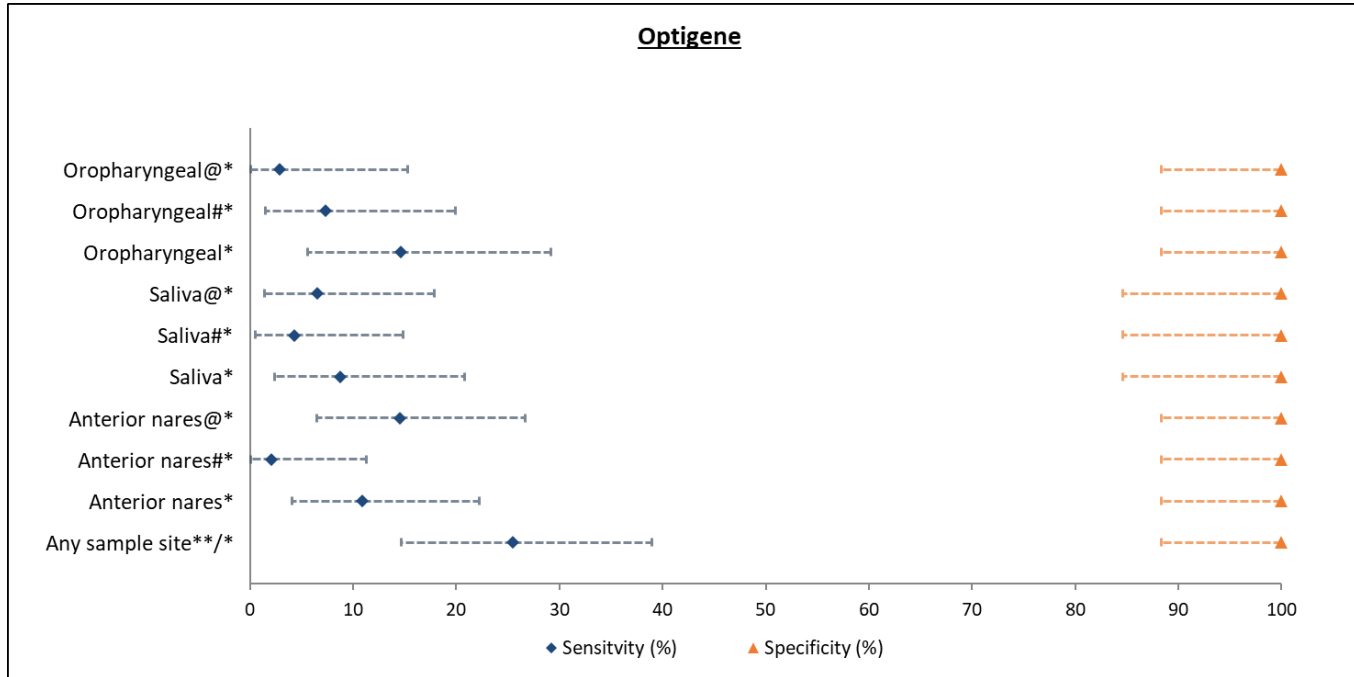

497

498 \*P-value < 0.05 for McNemar's test (continuity corrected); \*\*Any sample collection site positive out of the total samples collected is considered positive;

499 #Samples were tested in duplicates and the test was considered positive only if both were positive; @Samples were tested in duplicates and the test was

500 considered positive if either was positive

501

502 **Acknowledgements**

503

504 The field effort was a collaboration of the US National Cancer Institute (NCI) with Basic Health  
505 International (BHI), USA and Rutgers New Jersey Medical School (NJMS), USA. The BHI had  
506 collaboration with Hospital Nacional de Santa Ana, El Salvador, Hospital Materno Infantil de San  
507 Lorenzo, Ministerio de Salud Pública y Binestar Social (MSP-BS), Paraguay, Centro de  
508 Especialidades Dermatológicas, MSP-BS, Paraguay, Instituto de Investigaciones en Ciencias de la  
509 Salud, Universidad Nacional de Asunción, Paraguay, , and Medical College of Wisconsin, USA.

510

511 **Funding**

512

513 The research was funded by the intramural NCI Cancer Moonshot<sup>SM</sup> and intramural research  
514 program.

515

516 **Conflict of Interest**

517

518 The authors have nothing to declare. None of the companies had any role in design, analysis,  
519 interpretation, and finalization of the manuscript.

520

521 **Author's contributions**

522

523 NW, APN, NCD, JF, MM, RM, MC, KTD contributed substantially to the conception and design of  
524 the study. KA, LM, MM, RD, AV, CDA, MM, JF, MP, APN, MHE contributed to acquisition of data.  
525 MF, SG, NCD, BM contributed to running the test assays. KTD, LM, NW contributed to the  
526 analysis and interpretation. KTD, NW drafted the manuscript. All authors provided critical  
527 revision of the article and provided final approval of the version to publish.

528

### 529 **Ethical approval and informed consent**

530

531 The study was approved by the ethical review board of Comité Nacional de Ética de  
532 Investigación en Salud (IRB no.FWA00010986) in El Salvador, Comité de Ética, Instituto de  
533 Investigaciones en Ciencias de la Salud, Universidad Nacional de Asunción (IRB no. P37/2020) in  
534 Paraguay, MCW IRB (IRB no. FWA00000820) in Wisconsin, and the Newark Health Sciences IRB  
535 for Rutgers Biomedical Health Sciences (IRB no. Pro2020001801) in New Jersey. Written  
536 informed consent was obtained from all study participants.

537

### 538 **Availability of data**

539

540 The datasets used in the current study are available from the corresponding author on  
541 reasonable request

542

### 543 **Abbreviations:**

544

|     |            |                                                 |
|-----|------------|-------------------------------------------------|
| 545 | CI         | Confidence Interval                             |
| 546 | COVID-19   | Coronavirus Disease of 2019                     |
| 547 | CT         | Cycle Threshold                                 |
| 548 | EUA        | Emergency Use Authorization                     |
| 549 | iAMP       | Isothermal Amplification                        |
| 550 | IFU        | Instruction for Use                             |
| 551 | LAMP       | Loop-mediated Isothermal Amplification          |
| 552 | LMIC       | Low- and Middle- Income Countries               |
| 553 | LOD        | Limit of Detection                              |
| 554 | MCW        | Medical College of Wisconsin                    |
| 555 | NAAT       | Nucleic Acid Amplification Test                 |
| 556 | NP         | Nasopharyngeal                                  |
| 557 | OP         | Oropharyngeal                                   |
| 558 | NJMS       | Rutgers New Jersey Medical School               |
| 559 | RT-PCR     | Reverse Transcription-Polymerase Chain Reaction |
| 560 | SARS-COV-2 | Severe Acute Respiratory Syndrome Coronavirus 2 |
| 561 | SPSS       | Statistical Package of Social Studies           |
| 562 | VTM        | Viral Transport Medium                          |
| 563 |            |                                                 |
| 564 |            |                                                 |
